# Supplementary material
Source: PubMed Central journal article supplement (PMC4473327)
Supplement: ajcr0005-1507-f5.pdf [file ajcr0005-1507-f5.pdf]

## In vivo modeling of melanoma Vemurafenib resistance

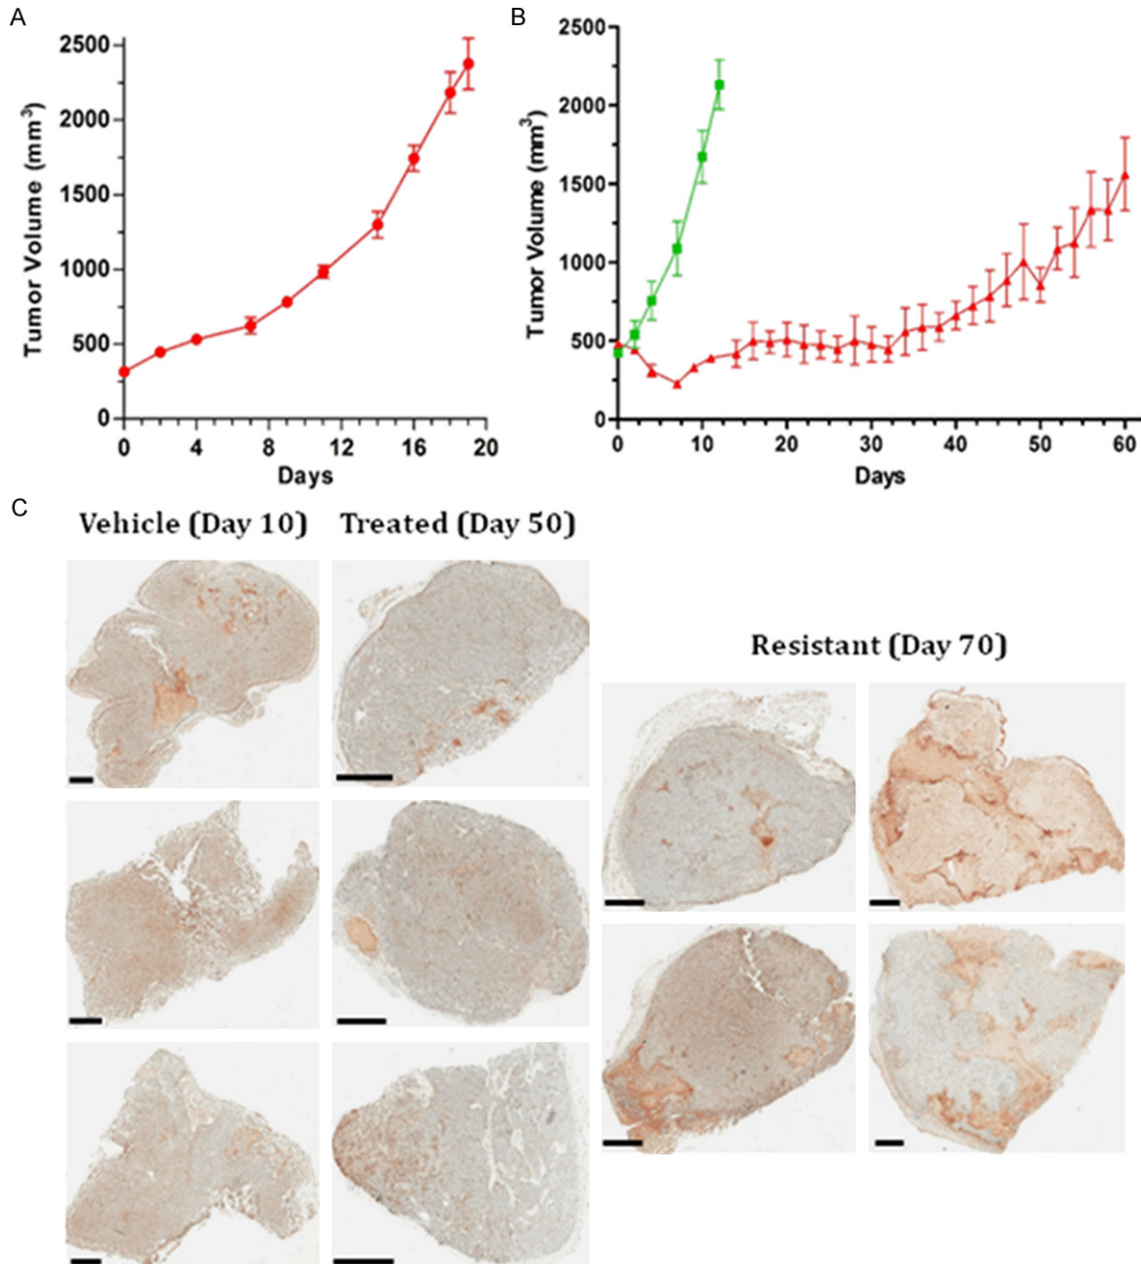

**Supplementary Figure 1.** Transplantation of Vemurafenib-resistant and Ki-67 IHC-based staining profiles. A. Patient 1 Vemurafenib-resistant tumors harvested on day 70 were re-engrafted in new recipient mice and maintained rapid growth phase in presence of Vemurafenib (50 mg/kg orally, twice a day, 5 d on, 2 d off). B. Patient 1 PDX model tumor responses to Vemurafenib (50 mg/kg orally, twice a day, 5 d on, 2 d off) are reproducible; compare this graph to **Figure 1A**. C. Staining for the proliferation-associated marker Ki-67 in whole mounts of tumors from mice exposed to vehicle alone for 10 d or Vemurafenib (50 mg/kg orally, twice a day, 5 d on, 2 d off) for 50 d; resistant tumors after 70 d of Vemurafenib exposure are also shown. Ki-67 levels were higher in vehicle-treated tumors and in Vemurafenib-resistant tumors. Scale bars indicate 1 mm.

# In vivo modeling of melanoma Vemurafenib resistance

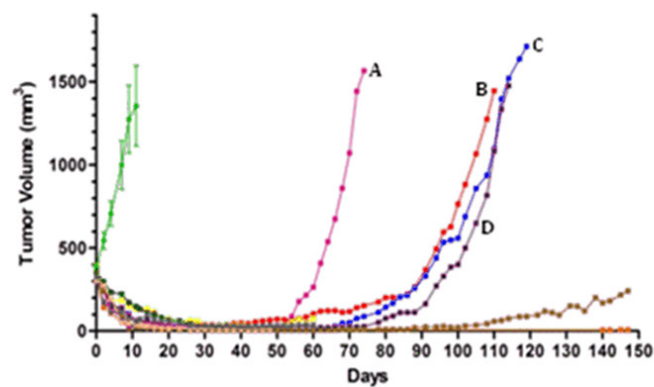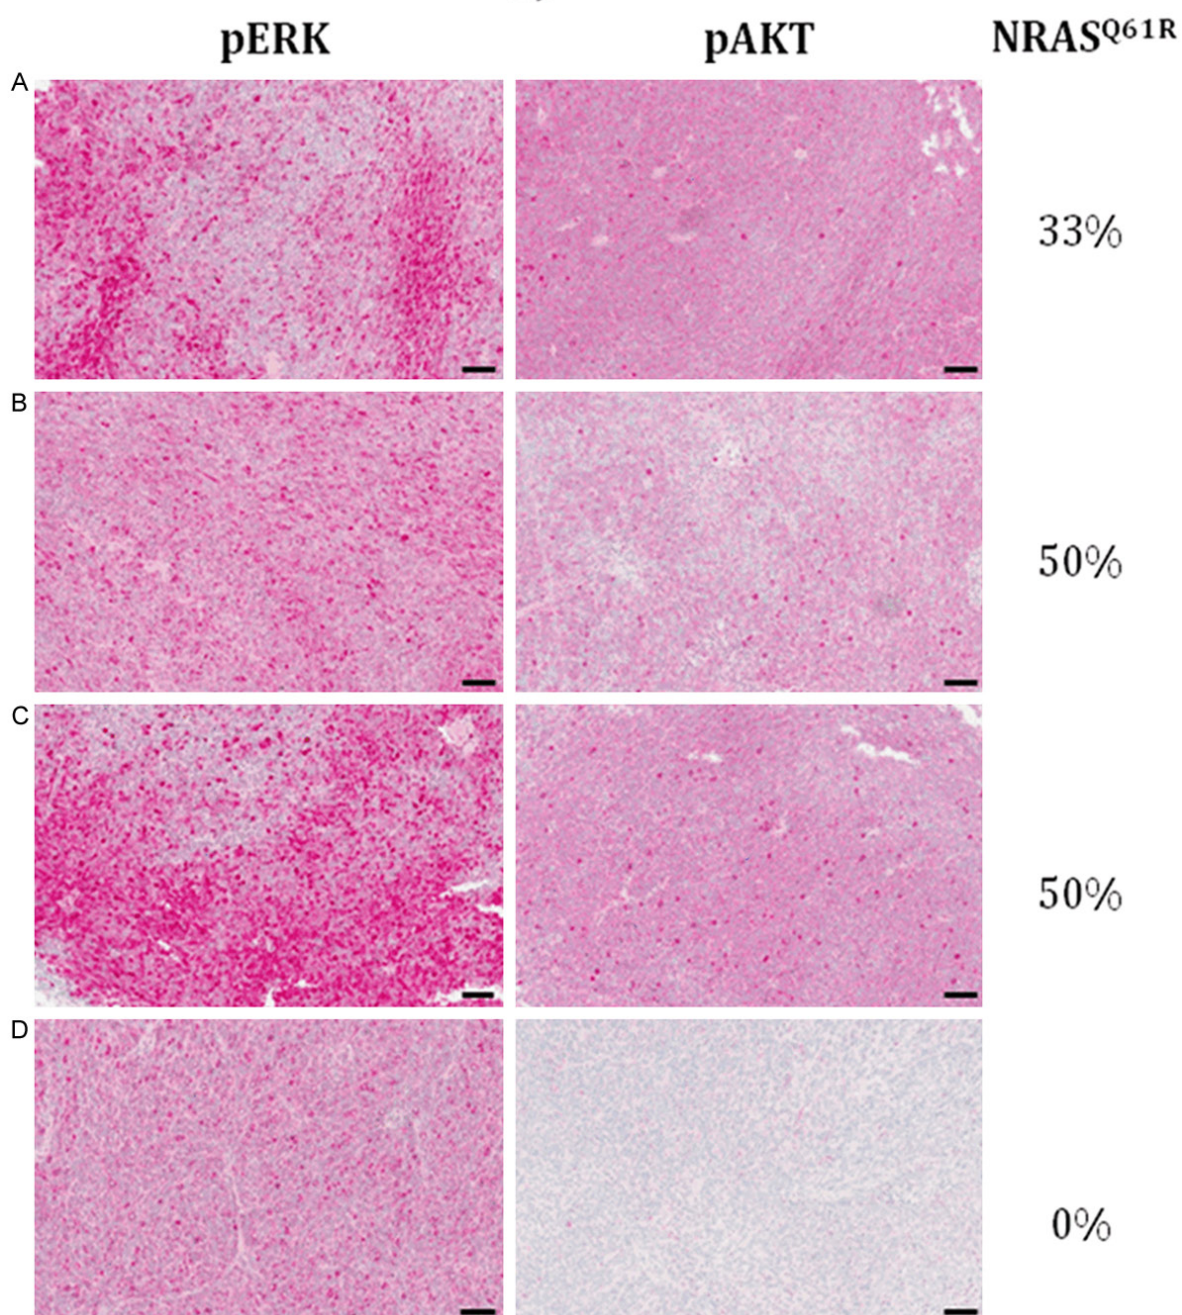

## In vivo modeling of melanoma Vemurafenib resistance

**Supplementary Figure 2.** Patient 2 Vemurafenib-resistant xenograft samples show similar IHC staining for pERK despite differences in resistance mechanisms linked to either NRAS or BRAF alternate splicing. Panels are labeled A through D to indicate the tumorgrafts from which they were derived in the top panel. pAKT staining is markedly reduced in the tumor (D) lacking the activating NRAS mutation. Scale bar indicates 100  $\mu$ m.

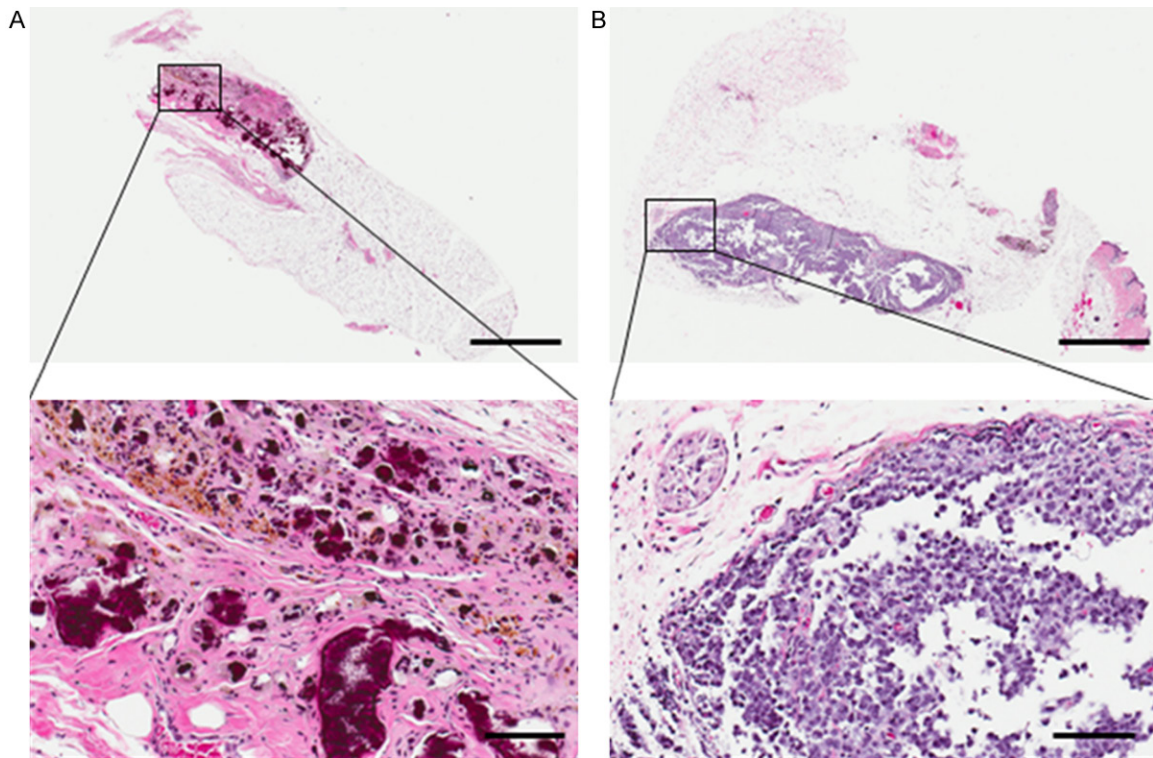

**Supplementary Figure 3.** Histological appearance of two different tumor sites from day-100 mice chronically exposed to Vemurafenib and PD0325901 (see **Figure 4A**). In panel A, no viable metastatic melanoma cells could be identified among the fibrocalcific nodules. In panel B, only a small cluster of viable residual metastatic melanoma cells was apparent; they had a high nuclear: cytoplasmic ratio and a relatively undifferentiated appearance. Note scale bar indicates 1 mm.
